- Fetal Pharmacology.** BY L. O. BOREUS. New York, Raven Press, 1973. Pp. 487. \$21.50.
- Psychiatric Complications of Medical Drugs.** BY R. I. SHADER. New York, Raven Press, 1972. Pp. 394. \$14.50.
- The Cardiac Rhythms.** BY R. E. PHILLIPS AND M. K. FEENEY. Philadelphia, W. B. Saunders, 1973. Pp. 354. \$12.00.
- Absorption, Distribution Transformation and Excretion of Drugs.** BY HUANG, KLINGELE, LEFEVRE, SCHARFF, AND WESTPHAL. EDITED BY P. KNOEFEL. Springfield, IL, Charles C Thomas, 1972. Pp. 220. \$13.50.
- International Symposium on Malignant Hyperthermia.** BY B. BRITT AND W. KALOW. EDITED BY R. A. GORDON. Springfield, IL, Charles C Thomas, 1973. Pp. 512 (131 il.). \$22.50.
- Muscle Relaxants (Major Problems in Anaesthesia Volume 1).** First edition. BY S. FELDMAN. Philadelphia, W. B. Saunders, 1973. Pp. 190. \$14.00.
- Fundamentals of Drug Metabolism and Drug Disposition.** BY B. N. LADU, H. G. MANDEL AND E. L. WAY. Baltimore, Williams and Wilkins, 1972. Pp. 615. \$15.00.
- Pharmacology of Adjuvant Drugs, Volume 10/11 Clinical Anesthesia Series.** BY H. ZAUDER AND J. ARTUSIO, JR. Philadelphia, F. A. Davis, 1973. Pp. 362. \$15.00.
- Practical Points in Anesthesiology.** BY D. C. STARK, assisted by R. B. ROBERTS. Flushing, NY, Medical Examination Publishing Co., 1974. Pp. 313. \$10.00.
- Anaesthesia and Analgesia in Dentistry.** BY R. A. GREENE, AND M. P. COPLANS. London, H. K. Lewis and Co., Ltd., 1973. Pp. 398. £7.00 net.
- Choline and Acetylcholine: Handbook of Chemical Assay Methods.** BY I. HANIN. New York, Raven Press, 1974. Pp. 234. \$15.95.
- Digital and Analog Data Conversions (Module 3).** BY H. V. MALMSTADT, C. G. ENKE, AND S. R. CROUCH. Menlo Park, CA, W. A. Benjamin Inc., 1973. Pp. 455.

## Literature Briefs

Myron B. Laver, M.D., Editor

Literature briefs were submitted by Drs. I. C. Andrews, R. Clark, A. Goldblatt, J. Levitt, W. Mannheim, Briefs appearing elsewhere in this issue are part of this column.

### Circulation

**TACHYCARDIA AND CORONARY-ARTERY DISEASE** This paper summarizes the hemodynamic consequences of maximal atrial pacing performed in conjunction with coronary-artery and left ventricular angiography in 41 patients. Thirty-one had coronary artery disease (CAD). Measurements included cardiac output (CO), mean femoral arterial pressure (LAM) and left ventricular end-diastolic pressure (LVEDP), from which stroke volume (SV) and stroke work (SW) were calculated. Left ventricular function (LVF) curves during incremental pacing were constructed. Ten normal patients paced up to  $130 \pm 6$  SEM beats/min manifested no change in CO or FAM; LVEDP, SV, and SW declined, indicating that LVF remained normal. In the CAD group, the atrial rate was

elevated to  $122 \pm 4$  SEM beats/min. Angina pectoris occurred in 18 patients, and ST-segment changes ( $> 1$  mm horizontal depression, lead II) appeared in five additional pain-free patients as evidence of ischemia. All patients were found to have angiographically demonstrable obstruction of more than one coronary artery. The ventriculograms were normal in only three patients in the CAD group. The ischemic signs at maximal pacing rates were invoked by the excessive myocardial oxygen demand. Interestingly, these signs were less common among patients with CAD and prior infarction, presumably due to the presence of scar tissue. Some patients with CAD had increased CO, FAM, and importantly, LVEDP (especially at the onset of angina, suggesting a decrease in LV compliance), which often climbed further with cessation of pacing. SV and SW were diminished, but LVF was abnormal in 17 patients and depressed in 16 of 18 who complained of angina. (Linhart, J.W.: *Atrial Pacing in Coronary Artery Disease. Am. J. Med.* 53:64, 1972.)
